# Supplementary material for: Red Raspberry Extract Protects the Skin against UVB-Induced Damage with Antioxidative and Anti-inflammatory Properties
Source: Oxid Med Cell Longev. 2019 Jan 6;2019:9529676. doi: 10.1155/2019/9529676 (PMC6339709; doi:10.1155/2019/9529676)
Supplement: Supplementary Materials — Supplementary data include typical 2-DE protein profiles of nude mouse skin samples. Close-up pictures indicate the changes in the levels of protein expression among various groups (Supplement Figure 1). Each spot volume was quantified by Prodigy SameSpots software and characterized by MALDI-TOF. Differential expression proteins were listed in the supplement table. Absorption spectrum of RBE in methanol had been shown in Supplement Figure 2. [file 9529676.f1.zip]

Archive with 3 entries (3 files):
- supplement table_OMCL_2526702.eps
- supplementfigure 1_OMCL_2526701.eps
- supplementfigure 2_OMCL_2526703.eps
